# Supplementary material
Source: HighWire-hosted journal article supplement (http://sti.bmjjournals.com/highwire/filestream/156170/field_highwire_adjunct_files/1/83suppl1i50webonlyfig1.pdf)
Supplement: 83suppl1i50webonlyfig1.pdf [file 83suppl1i50webonlyfig1.pdf]

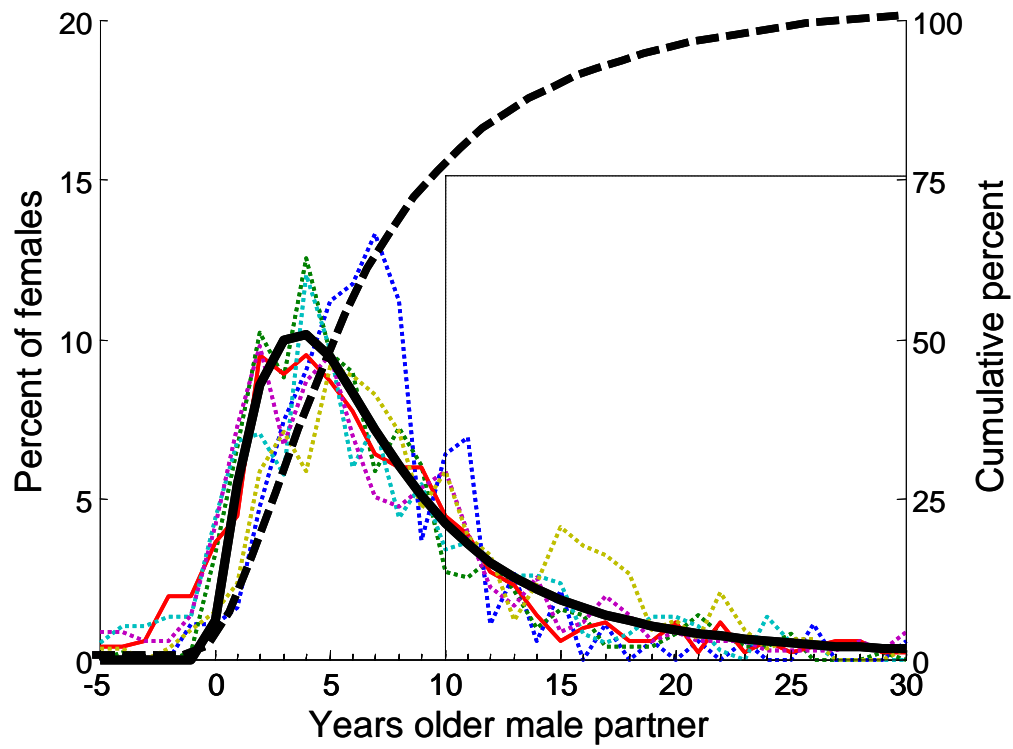

**Figure S1: The percentage of females' partnerships formed with males a given number of years older (dotted line), by females aged 15-19, 20-24, 25-29, 30-34, 35-39 and 40-44 years. Solid line is log-logistic function fitted to data pooled from all ages and dashed line is corresponding cumulative distribution.**
